# Supplementary material for: Possible gadolinium ions leaching and MR sensitivity over-estimation in mesoporous silica-coated upconversion nanocrystals
Source: Royal Society of Chemistry journal article supplement (doi:10.1039/c3nr01902k), 2013-01-01
Supplement: c3nr01902k.pdf [file c3nr01902k.pdf]

## Supplementary Information

### **Possible Gadolinium Ions Leaching and MR Sensitivity Over-Estimation in Mesoporous Silica-Coated Upconversion Nanocrystals**

*Shengjian Zhang,<sup>‡</sup> Zhaoxia Jiang,<sup>‡</sup> XiaoHang Liu, Liangping Zhou, Weijun Peng\**

Department of Radiology, Fudan University Shanghai Cancer Center; Department of  
Oncology, Shanghai Medical College, Fudan University, Shanghai 200032, China

E-mail: weijunpeng@yahoo.cn

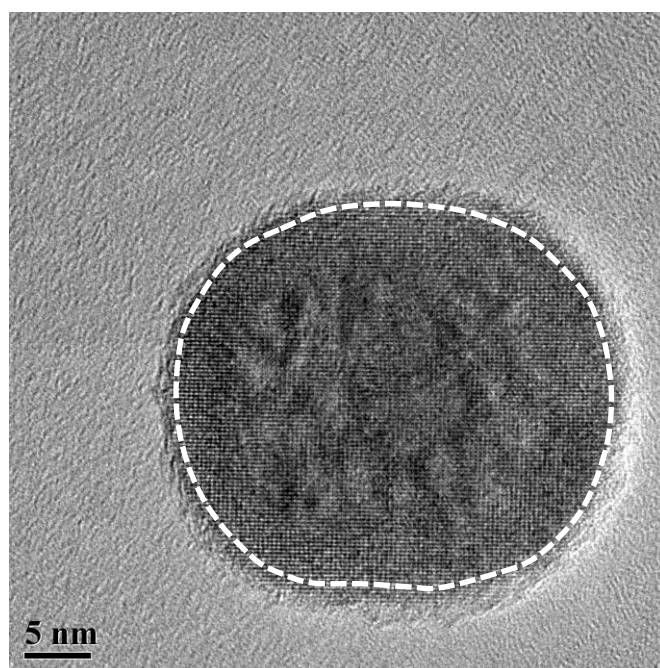

**Figure S1.** High resolution TEM image of highly crystalline  $\text{NaYF}_4:\text{Er}/\text{Yb}@\text{NaGdF}_4$ .  
White line represents the boundary of  $\text{NaYF}_4$  and  $\text{NaGdF}_4$ .

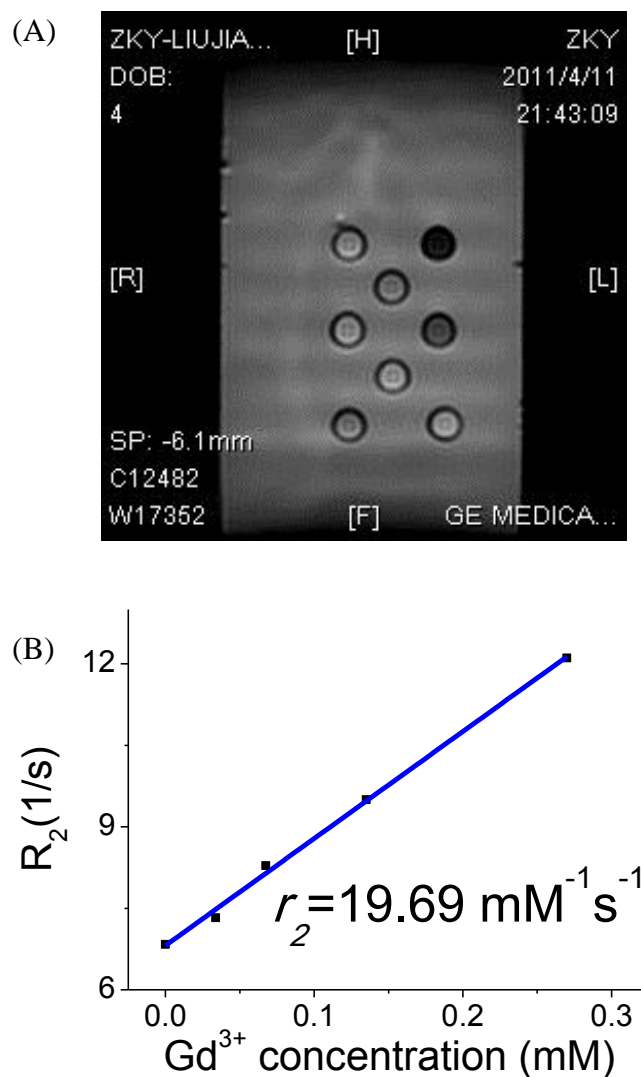

**Figure S2.** (A) T<sub>2</sub>-map of free Gd<sup>3+</sup> ions. (B) Plot of  $R_2$  (1/s) versus Gd<sup>3+</sup> ion concentration (mM), the slope indicates the specific relaxivity ( $r_2$ ).  $r_2/r_1 = 2.2$ .

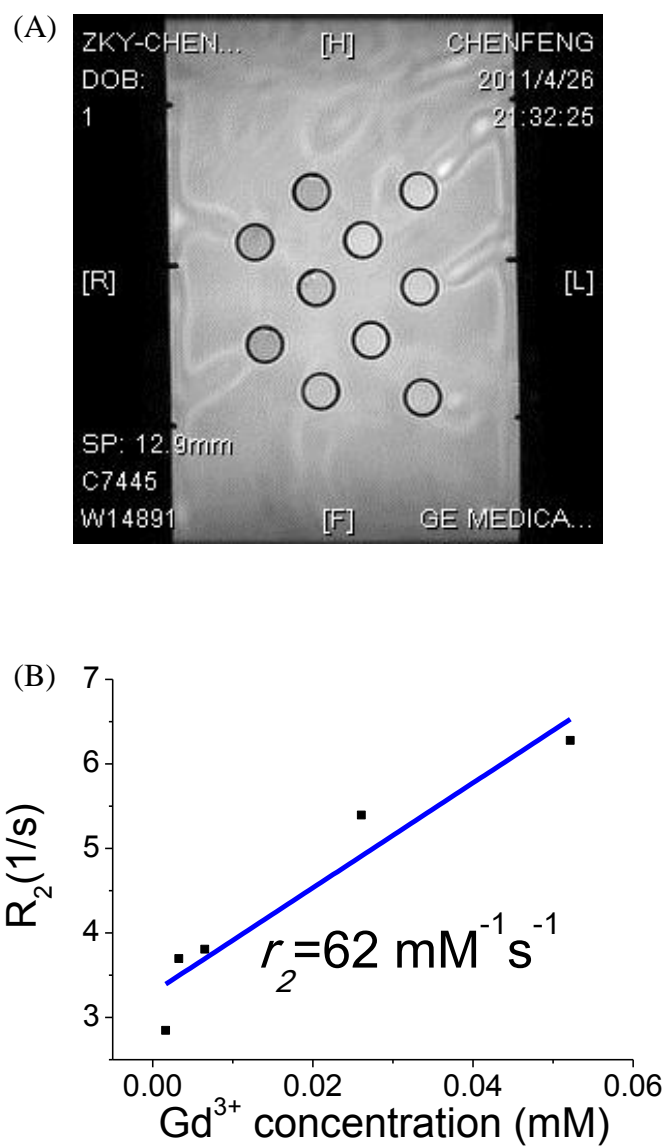

**Figure S3.** (A) T<sub>2</sub>-map of Core@NaGdF<sub>4</sub>@m-SiO<sub>2</sub> (inner core damaged). (B) Plot of R<sub>2</sub> (1/s) versus Gd<sup>3+</sup> ion concentration (mM), the slope indicates the specific relaxivity (*r*<sub>2</sub>). *r*<sub>2</sub>/*r*<sub>1</sub> = 9.6.

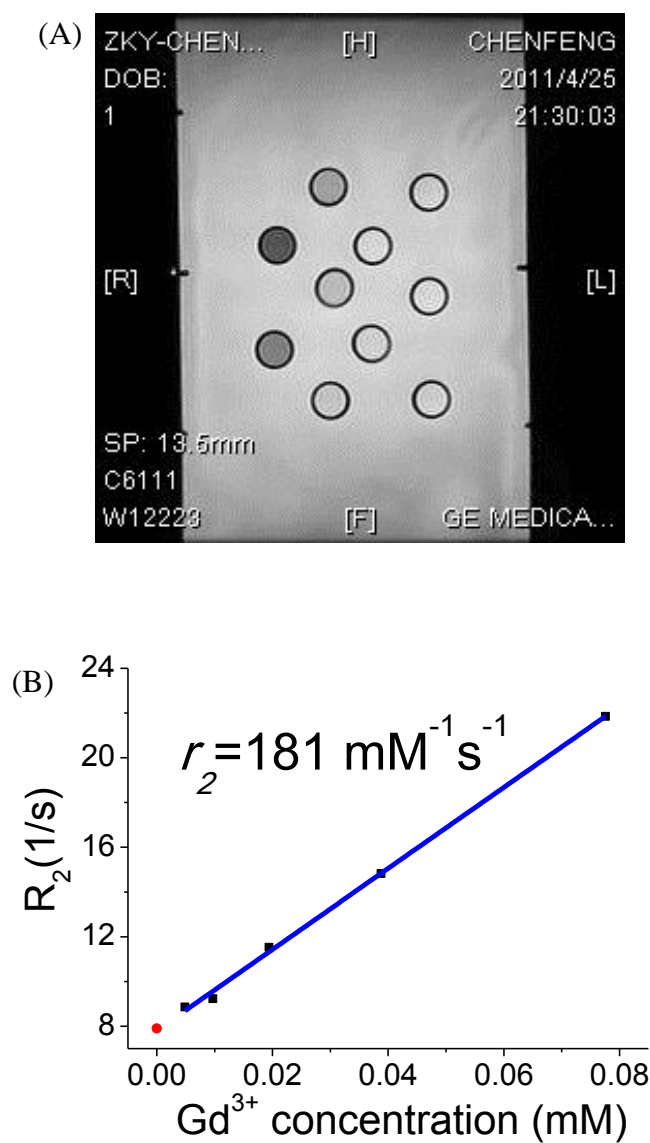

**Figure S4.** (A) T<sub>2</sub>-map of Core@NaGdF<sub>4</sub>@m-SiO<sub>2</sub> obtained by calcination. (B) Plot of  $R_2$  (1/s) versus Gd<sup>3+</sup> ion concentration (mM), the slop indicates the specific relaxivity ( $r_2$ ).  $r_2/r_1 = 59.3$ .

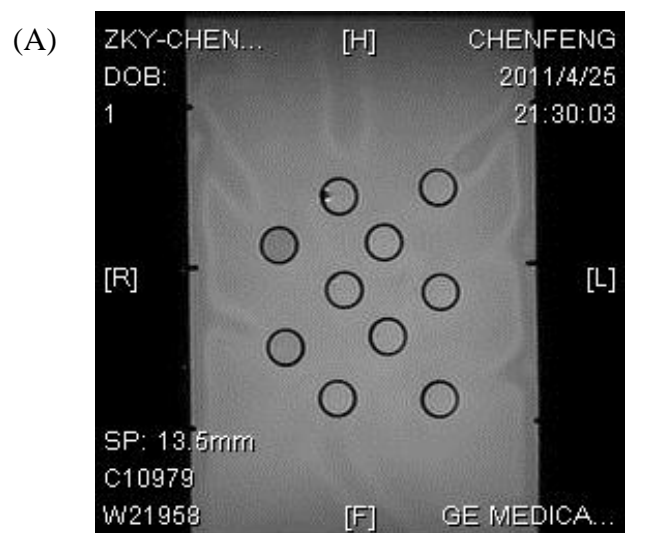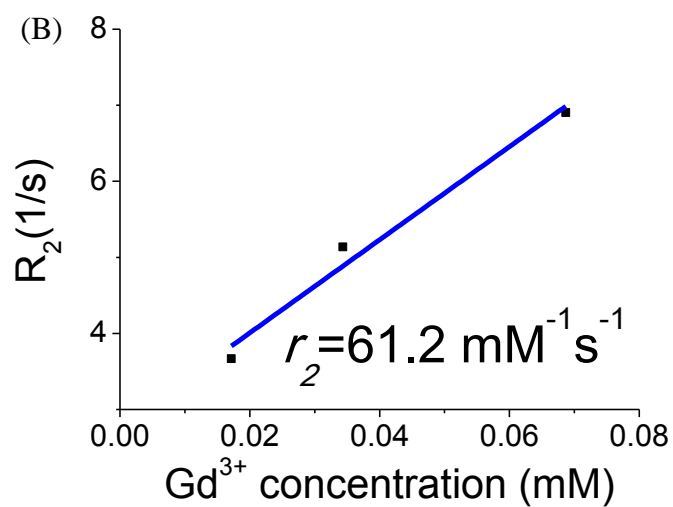

**Figure S5.** (A) T<sub>2</sub>-map of Core@NaGdF<sub>4</sub>@d-SiO<sub>2</sub>. (B) Plot of R<sub>2</sub> (1/s) versus Gd<sup>3+</sup> ion concentration (mM), the slop indicates the specific relaxivity ( $r_2$ ).  $r_2/r_1 = 9.6$ .

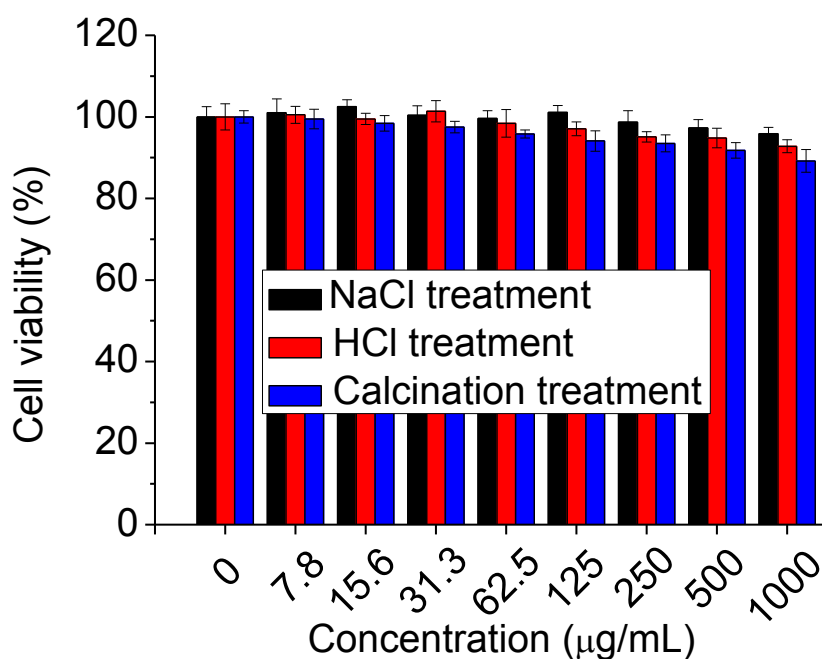

**Figure S6.** MTT cell viability assay of UCNP@m-SiO<sub>2</sub> after different treatments to extract CTAB on HeLa cells for 24 h incubation. To decrease the cytotoxicity of calcined nanoparticles, they were subject to centrifuge at 3000 r/min for 3 min to exclude large-sized nanoparticles.

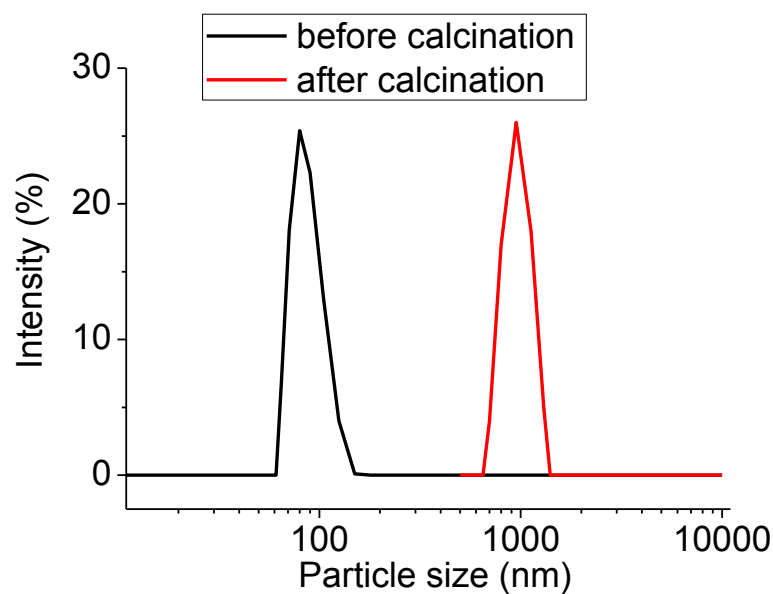

**Figure S7.** DLS measurements of Core@NaGdF<sub>4</sub>@m-SiO<sub>2</sub> before and after calcinations.
